# Supplementary material
Source: Springer Nature journal article supplement (https://www.springermedizin.de/resource/supplementary/13012_2013_602_MOESM1_ESM.pdf/9630366)
Supplement: MOESM1 [file 9630366]

**Additional File 1.** Frame to guide data collection from the cases, following a realist evaluation approach.

| <b>ENABLING POLICY ENVIRONMENT AND NETWORKS</b> |                                                                                                    |                                                            |                     |
|-------------------------------------------------|----------------------------------------------------------------------------------------------------|------------------------------------------------------------|---------------------|
| <b>Criteria</b>                                 | <b>Indicator</b>                                                                                   | <b>Source and method for collecting data</b>               | <b>CMO in focus</b> |
| Coordination                                    | Exists figure of coordinator/responsible for IPV within health service                             | Interviews                                                 | Outcome             |
| Relationship with higher levels                 | Has somebody in the health center participated in the working groups of the NCAGBV?                | Documentary review, interviews                             | Context             |
|                                                 | Relationship with regional representatives of the groups or other persons responsible for IPV?     | Documentary review, interviews                             | Context             |
| Care pathways for abused women available        | Relationship-networks with other resources for abused women in the neighborhood and their response | Interviews with HF and other resources, documentary review | Context, Mechanisms |
|                                                 | Local pathways for abused women available and used in HC                                           | Documentary review, interviews, observation                | Outcome             |

| <b>TEAM CULTURE AND VALUES</b>     |                                               |                                              |                     |
|------------------------------------|-----------------------------------------------|----------------------------------------------|---------------------|
| <b>Criteria</b>                    | <b>Indicator</b>                              | <b>Source and method for collecting data</b> | <b>CMO in focus</b> |
| Attitudes and values regarding IPV | PREMIS questionnaire- knowledge and attitudes | Interviews                                   | Outcome             |

| <b>TRAINING OF HEALTH PROFESSIONALS</b> |                                                                                                         |                                                          |                                    |
|-----------------------------------------|---------------------------------------------------------------------------------------------------------|----------------------------------------------------------|------------------------------------|
| <b>Criteria</b>                         | <b>Indicator</b>                                                                                        | <b>Source and method for collecting data</b>             | <b>CMO in focus</b>                |
| All staff involved in training          | Training activities in which staff have participated (type, duration, etc)                              | Interview                                                | Context (Intervention)             |
| Supervision and reinforcement           | Periodic meetings that discuss cases of IPV                                                             | Interviews & observation & reports (minutes of meetings) | Outcome                            |
| Perceptions on training process:        | Logistic aspects: easy to attend? Well rewarded/acknowledged?                                           | Interviews                                               | Context (Intervention), Mechanisms |
|                                         | Training- contents: which aspects were most interesting? Which aspects most conflictive?                | Interviews                                               | Context (Intervention), Mechanisms |
|                                         | Training-applicability: Which aspects more relevant for their work?                                     | Interviews                                               | Context (Intervention), Mechanisms |
|                                         | Training-quality: Quality of trainers and training?                                                     | Interviews                                               | Context (Intervention), Mechanisms |
|                                         | Training- support: evaluate monitoring and support provided, continuous training, ability to try things | Interviews                                               | Context (Intervention), Mechanisms |
|                                         | Training-implementation: the process from attending training to implementing changes                    | Interviews                                               | Mechanism                          |

| <b>ACCOUNTABILITY AND MONITORING</b>                    |                                                                                  |                                                                                       |                     |
|---------------------------------------------------------|----------------------------------------------------------------------------------|---------------------------------------------------------------------------------------|---------------------|
| <b>Criteria</b>                                         | <b>Indicator</b>                                                                 | <b>Source and method for collecting data</b>                                          | <b>CMO in focus</b> |
| Monitoring system that provides data on number of cases | Common indicators 1-11 from 2008 until 2012                                      | Collected data in HC; measure whether data are collected and changes through time     | Outcome             |
|                                                         | PREMIS questionnaire-cases attended                                              | Questionnaire applied to all providers                                                | Outcome             |
|                                                         | Other indicators related to IPV collected in the HC                              | Collected data in HC; measure whether data are collected and changes over time        | Outcome             |
| Debriefing support                                      | Does it exist ways for de-briefing support?                                      | Interviews                                                                            | Outcome             |
| System to learn from women's experiences of the service | Does it exist ways to collect information on women's experiences of the service? | Interviews & Observation (existence of mechanisms or not and women's view of service) | Outcome             |

| <b>PROTOCOLS AND GUIDELINES</b>                                                 |                                                                                        |                                                                        |                     |
|---------------------------------------------------------------------------------|----------------------------------------------------------------------------------------|------------------------------------------------------------------------|---------------------|
| <b>Criteria</b>                                                                 | <b>Indicator</b>                                                                       | <b>Source and method for collecting data</b>                           | <b>CMO in focus</b> |
| Clinical guidelines for responding to IPV in place and implementation monitored | Protocol and/or guidelines available and used or own protocol elaborated               | Interviews & Observation                                               | Outcome             |
|                                                                                 | Procedures to monitor adequate implementation of IPV management                        | Interview & Observation & Documentary review (minutes)                 | Outcome, Mechanisms |
| Health systems and services                                                     | Providers during the consultation document what the woman says                         | Interview & Observation & Audit of clinical records                    | Outcome             |
|                                                                                 | Providers during the consultation validate the women's experiences                     | Interview & Observation                                                | Outcome             |
|                                                                                 | Providers have non-judgmental attitudes                                                | Interview & Observation                                                | Outcome             |
|                                                                                 | Providers give medical treatment and inform about crisis center and long-term services | Interview & Observation & audit of clinical records                    | Outcome             |
|                                                                                 | Providers support safety planning                                                      | Interview & Observation & audit of clinical records & Common Indicator | Outcome             |
|                                                                                 | Providers refer to other services                                                      | Interview & Observation & audit of clinical records & Common Indicator | Outcome             |

|                                    |                                                                                                           |                                                                         |          |
|------------------------------------|-----------------------------------------------------------------------------------------------------------|-------------------------------------------------------------------------|----------|
| Psychosocial and emotional support | Providers listen and assess the risks                                                                     | Interviews & Observation & audit of clinical records                    | Outcome  |
|                                    | Providers do not contact the woman's partner                                                              | Interviews & Observation & audit of clinical records                    | Outcome  |
| Non-negotiable issues              | Provider reassures the woman that confidentiality will be safeguarded                                     | Interviews & Observation                                                | Outcome  |
|                                    | Medical records are kept confidential and safe                                                            | Interviews & Observation                                                | Outcome  |
| "Screening"                        | Screening in ANC                                                                                          | Interview & Observation & Documentary review (records, screening tools) | Outcomes |
|                                    | Screening in abortion care                                                                                | Interview & Observation & Documentary review (records, screening tools) | Outcomes |
|                                    | During first consultation with women, exploratory questions to assess the existence of IPV are introduced | Interview & Observation & records (audit clinical records)              | Outcomes |

| <b>PREVENTION, PROMOTION AND WORK WITH WOMEN IN VULNERABLE SITUATIONS</b> |                                                                |                                               |                     |
|---------------------------------------------------------------------------|----------------------------------------------------------------|-----------------------------------------------|---------------------|
| <b>Criteria</b>                                                           | <b>Indicator</b>                                               | <b>Source and method for collecting data</b>  | <b>CMO in focus</b> |
| Prevention and promotion activities carried out by the HC team            | Any activities carried out aimed for prevention of IPV         | Interviews & Observation & documentary review | Outcomes            |
|                                                                           | Any activities focusing on women in situation of vulnerability | Interviews & Observation & documentary review | Outcomes            |

| <b>OTHERS</b>   |                                                                                                    |                                               |                     |
|-----------------|----------------------------------------------------------------------------------------------------|-----------------------------------------------|---------------------|
| <b>Criteria</b> | <b>Indicator</b>                                                                                   | <b>Source and method for collecting data</b>  | <b>CMO in focus</b> |
|                 | Any prize or acknowledgment received                                                               | Interviews & Observation & documentary review | Outcomes            |
|                 | Reports of previous evaluations                                                                    | Interviews & Documentary review               | All                 |
|                 | Research conducted                                                                                 | Interviews & Documentary review               | All                 |
|                 | Perception of other actors dealing with IPV in the neighborhood regarding the HC management of IPV | Interviews                                    | All                 |

CMO in focus: Intervention, context (local) and Outcomes. Mechanisms are developed through the interaction of all of them, and the exploration of all will add to defining mechanisms. Context here refer to the local context where the HF is located and also on how the HF perceives its relationship with the regional and national context (collected in the previous study)
